# Supplementary material
Source: publisher site journal article supplement (https://www.dovepress.com/article/436294)
Supplement: Supplementary file 1 [file get_supplementary_file.php]

**Supplementary Table 1. Characteristics of included healthcare providers and managers**  
(n=33)

| No. | Area  | Setting                    | Field of practice                     | Sex    | Working years |
|-----|-------|----------------------------|---------------------------------------|--------|---------------|
| #1  | Rural | Primary healthcare setting | General practice/Physician            | Male   | 5-10          |
| #2  | Rural | Primary healthcare setting | Public health/Family physician        | Female | >10           |
| #3  | Rural | Primary healthcare setting | Public health/Family physician        | Male   | 5-10          |
| #4  | Rural | Primary healthcare setting | Public health/Family physician        | Female | 5-10          |
| #5  | Rural | Primary healthcare setting | Public health/Family physician        | Male   | >10           |
| #6  | Rural | Primary healthcare setting | Public health/Family physician        | Male   | >10           |
| #7  | Urban | Primary healthcare setting | Public health/Family physician        | Female | >10           |
| #8  | Urban | Secondary hospital         | Neurology/Physician                   | Male   | >10           |
| #9  | Urban | Secondary hospital         | Cardiology/Nurse                      | Female | >10           |
| #10 | Urban | Secondary hospital         | General practice/Physician            | Female | >10           |
| #11 | Urban | Secondary hospital         | General practice/Physician            | Male   | >10           |
| #12 | Urban | Secondary hospital         | Cardiology/Physician                  | Female | <5            |
| #13 | Urban | Secondary hospital         | Rehabilitation therapist              | Female | <5            |
| #14 | Urban | Secondary hospital         | Administration/Continuous care center | Male   | >10           |
| #15 | Urban | Secondary hospital         | Administration/Informatics            | Male   | >10           |
| #16 | Urban | Secondary hospital         | Administration/Professional training  | Male   | >10           |
| #17 | Urban | Secondary hospital         | General practice/Physician            | Male   | >10           |
| #18 | Urban | Secondary hospital         | Administration/Public health          | Female | >10           |
| #19 | Urban | Secondary hospital         | Administration/Finance                | Female | 5-10          |
| #20 | Urban | Secondary hospital         | General internal medicine/Nurse       | Female | >10           |
| #21 | Urban | Secondary hospital         | Geriatrics/Physician                  | Male   | >10           |
| #22 | Urban | Secondary hospital         | Geriatrics/Nurse                      | Female | >10           |
| #23 | Urban | Secondary hospital         | Administration                        | Male   | 5-10          |

---

|     |       |                    |                                         |        |      |
|-----|-------|--------------------|-----------------------------------------|--------|------|
| #24 | Urban | Secondary hospital | Administration/Nursing<br>department    | Female | >10  |
| #25 | Urban | Secondary hospital | Endocrinology/Nurse                     | Female | >10  |
| #26 | Urban | Secondary hospital | Administration/Medical<br>department    | Male   | >10  |
| #27 | Urban | Secondary hospital | Administration/Informatics              | Male   | >10  |
| #28 | Urban | Secondary hospital | Administration/Finance                  | Male   | >10  |
| #29 | Urban | Secondary hospital | Administration/Outpatient<br>department | Male   | >10  |
| #30 | Urban | Tertiary hospital  | Geriatrics/Nurse                        | Female | 5-10 |
| #31 | Urban | Tertiary hospital  | Geriatrics/Physician                    | Female | >10  |
| #32 | Urban | Tertiary hospital  | General practice/Physician              | Female | >10  |
| #33 | Urban | Tertiary hospital  | Nephrology/Nurse                        | Female | >10  |

---
